# Supplementary material
Source: PubMed Central journal article supplement (PMC2905850)
Supplement: NIHMS217857-supplement-01.pdf [file NIHMS217857-supplement-01.pdf]

1  
2  
3 423 **Supplementary table.** Four-hour postprandial lipoproteins, apoproteins and hsCRP at  
4  
5 424 the end of experimental diet phases  
6

|                                         | Corn Oil                 | Partially-<br>Hydrogenated<br>Soybean Oil | <i>P</i> value |
|-----------------------------------------|--------------------------|-------------------------------------------|----------------|
| Total cholesterol (mmol/L) <sup>1</sup> | 5.46 ± 0.71 <sup>2</sup> | 5.82 ± 0.73                               | 0.0007         |
| LDL-cholesterol (mmol/L)                | 3.21 ± 0.50              | 3.58 ± 0.66                               | 0.0003         |
| VLDL-cholesterol (mmol/L)               | 0.86 ± 0.49              | 0.85 ± 0.42                               | 0.903          |
| HDL-cholesterol (mmol/L)                | 1.41 ± 0.37              | 1.38 ± 0.36                               | 0.287          |
| Triglyceride (mmol/L)                   | 2.18 ± 1.09              | 2.20 ± 0.84                               | 0.846          |
| Total cholesterol:HDL-cholesterol       | 4.10 ± 1.05              | 4.45 ± 1.11                               | 0.0002         |
| Lipoprotein (a) (μmol/L)                | 0.89 ± 0.90              | 0.95 ± 0.92                               | 0.032          |
| Apoprotein B (g/L)                      | 1.00 ± 0.16              | 1.11 ± 0.19                               | 0.001          |
| Apoprotein AI (g/L)                     | 1.54 ± 0.22              | 1.53 ± 0.21                               | 0.575          |
| hsCRP (mg/L; n=26)                      | 1.83 ± 1.77              | 1.86 ± 1.97                               | 0.547#         |

41 425 <sup>1</sup>N=30 participants.  
42

43 426 <sup>2</sup>Values are mean±SD. A paired t-test was conducted to compare the data at the end of  
44  
45 427 each diet phase. LDL=low density lipoprotein; VLDL=very low density lipoprotein;  
46  
47  
48 428 HDL=high density lipoprotein; hsCRP=high sensitivity C-reactive protein. # A  
49  
50 429 nonparametric signed-rank test was used for this comparison.  
51  
52

53 430  
54  
55  
56  
57  
58  
59  
60  
61  
62  
63  
64  
65
